# Supplementary material for: Human tracking with an infrared camera using a curve matching framework
Source: Springer Nature journal article supplement (doi:10.1186/1687-6180-2012-99), 2012-05-03
Supplement: 13634_2011_200_MOESM9_ESM.pdf [file 13634_2011_200_MOESM9_ESM.pdf]

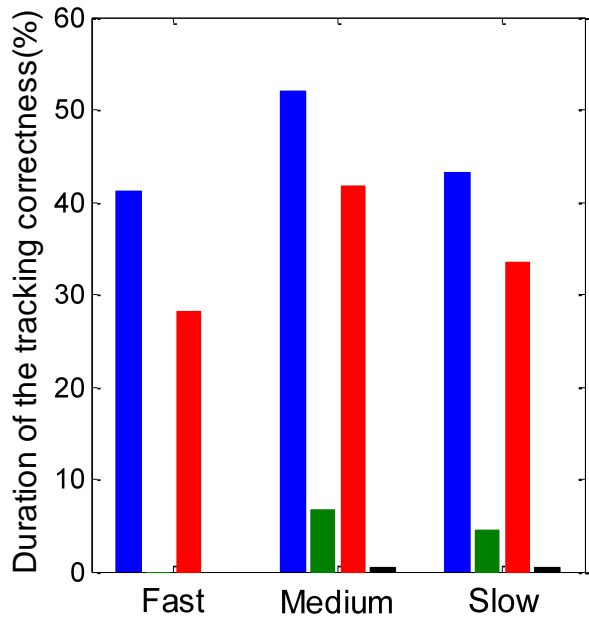

(a) Ground-proof

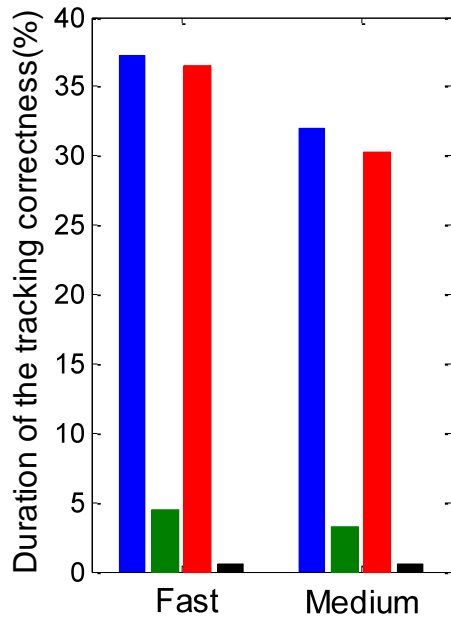

(b) Human target-only

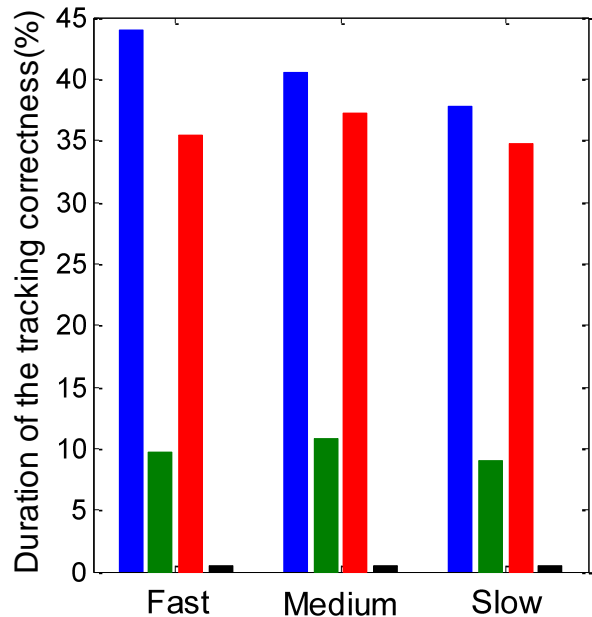

(c) Noisy-environment

Legend: CMKF (blue), Arbitrate OFKF (green), Particle filter (red), Optical Flow (black)
