# Supplementary material for: Human tracking with an infrared camera using a curve matching framework
Source: Springer Nature journal article supplement (doi:10.1186/1687-6180-2012-99), 2012-05-03

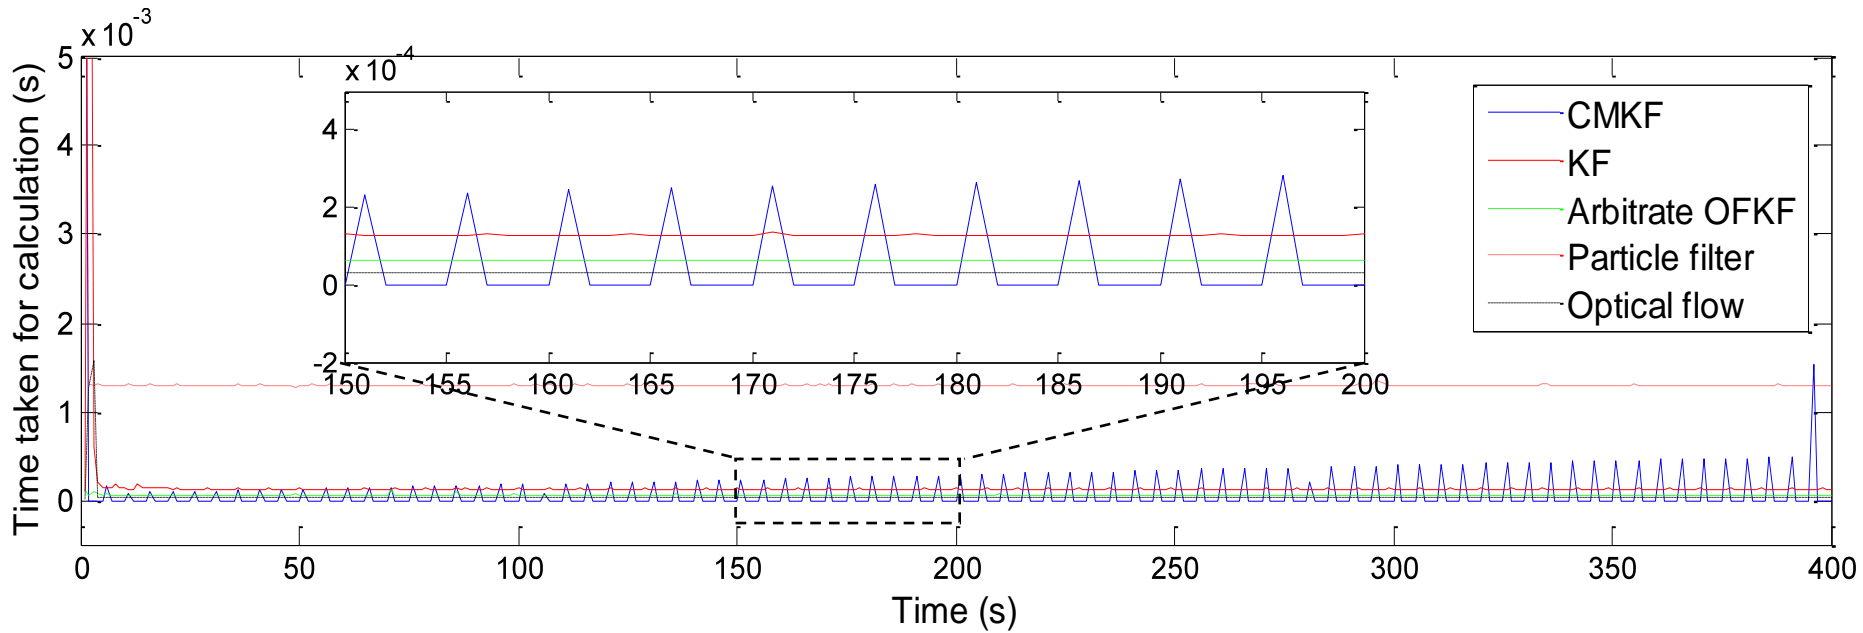

Supplement: 13634_2011_200_MOESM10_ESM.pdf [file 13634_2011_200_MOESM10_ESM.pdf]
