# Supplementary material for: Human tracking with an infrared camera using a curve matching framework
Source: Springer Nature journal article supplement (doi:10.1186/1687-6180-2012-99), 2012-05-03
Supplement: 13634_2011_200_MOESM12_ESM.pdf [file 13634_2011_200_MOESM12_ESM.pdf]

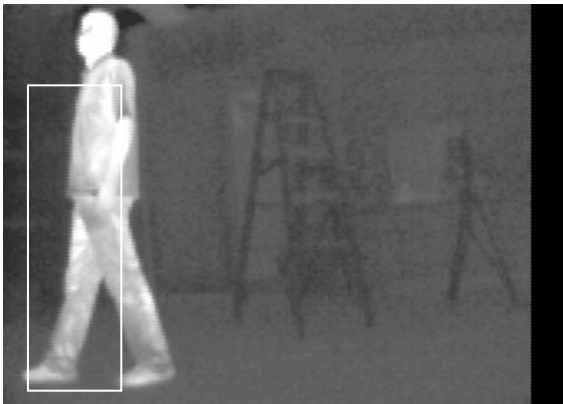

(a)

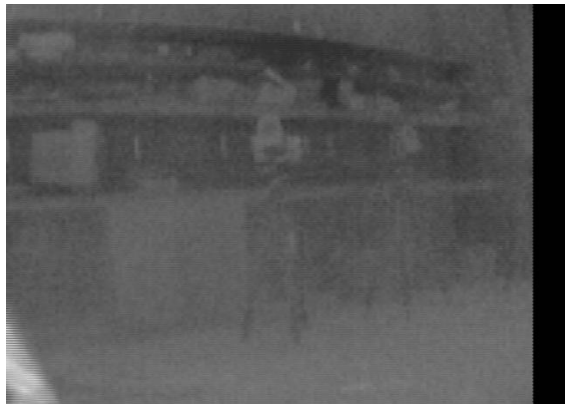

(b)

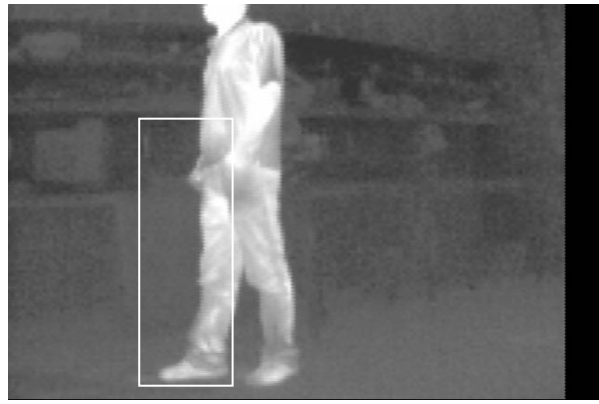

(c)
